# Supplementary material
Source: PubMed Central journal article supplement (PMC2323353)

# Microarray Based Diagnosis Profits from Better Documentation of Gene Expression Signatures — *supplement* —

Dennis Kostka\* and Rainer Spang†

\* Max Planck Institute for Molecular Genetics  
Ihnestrasse 63-73, 14195 Berlin, Germany

† Institute for Functional Genomics  
Computational Diagnostics Group  
Josef-Engert-Strasse 9, 93503 Regensburg, Germany

## Contents

|          |                                                       |          |
|----------|-------------------------------------------------------|----------|
| <b>1</b> | <b>Confidence intervals for the consistency index</b> | <b>2</b> |
| <b>2</b> | <b>Software</b>                                       | <b>2</b> |
| 2.1      | Preprocessing . . . . .                               | 2        |
| 2.2      | Building the classification rule . . . . .            | 3        |
| 2.3      | Documentation by value . . . . .                      | 3        |
| 2.4      | Diagnosing an external patient . . . . .              | 3        |
| <b>3</b> | <b>Supplement Figures</b>                             | <b>4</b> |

# 1 Confidence intervals for the consistency index

In the context of the resampling experiment described in the paper, let there be  $n$  patients in the study, each predicted at least  $m$  times. For patients predicted more often, a random subsample of size  $m$  is taken. Let  $\mathbf{p} \in \mathbb{R}^{nm}$  be the vector of predictions and  $\mathbf{p}^*$  the reference predictions. Then consistency is defined as

$$\bar{c} = \frac{1}{nm} \sum_i^{nm} \underbrace{\delta(\mathbf{p}_i - \mathbf{p}_i^*)}_{\mathbf{c}_i}.$$

If the entries  $\mathbf{c} = (\mathbf{c}_1, \dots, \mathbf{c}_{nm})$  arise from *iid* Bernoulli variables with success-parameter  $p$ , then  $nm \cdot \bar{c}$  is distributed binomially with parameters  $p$  and  $N = nm$ . Estimates for  $\bar{c}$  and confidence intervals follow directly from the binomial distribution.

## Confidence intervals for the consistency gain

The consistency gain or documentation effect is defined by  $\bar{c}_\star := \bar{c}_{\text{val.}} - \bar{c}_{\text{ref.}}$ . Assuming the same model as in the last paragraph,  $nm \cdot \bar{c}_\star$  is the difference of two binomially distributed random variables with parameters  $nm, \bar{c}_{\text{val.}}$  and  $\bar{c}_{\text{ref.}}$ , respectively. Performing the convolution numerically yields confidence intervals.

## 2 Software

In this section we give a description of the software we provide as well as instructions how to use it. It is written in the R programming language [?] and makes use of packages contributed to the Bioconductor project [?], most notably `vsn` and `affy`, as well as of the `pamr` [?] package obtainable via CRAN [?]. The software we provide can be downloaded from <http://www.compdiag.molgen.mpg.de>.

To lead through the steps of building a signature documented by value, we assume a collection of `.cel`-files is located in a directory "mydir" awaiting analysis.

### 2.1 Preprocessing

Data are preprocessed using `rma` as well as `vsn` preprocessing. The variables `par.vsn` and `par.rma` hold the parameter sets determined in the theory section. We proceed in three steps:

*i)* Read in the data

```
> setwd("mydir")
> abo = ReadAffy()
```

*ii)* Preprocessing using `rma`

```
> exs.rma = wrap.pag(abo, method = "rma")
> par.rma = preproc(description(exs.rma))$pag
```

iii) Preprocessing using vsn

```
> exs.vsn = wrap.pag(abo, method = "vsn")
> par.vsn = preproc(description(exs.vsn))$pag
```

## 2.2 Building the classification rule

A classification rule is derived using `pamr`. The function `pamr.fil` is a simple wrapper, performing model selection based on crossvalidation-error. The vector `my.labels` holds class information for the study data.

```
> lab = my.labels
> sig.vsn = pamr.fil(exs.vsn, lab, fil = FALSE)
> sig.rma = pamr.fil(exs.rma, lab, fil = FALSE)
```

## 2.3 Documentation by value

We document the classification rules by value: The signature, together with the data-dependent scale information, is stored in a binary format for later application to external samples:

```
> sig.byval.rma = list(sig = sig.rma, params = par.rma)
> sig.byval.vsn = list(sig = sig.vsn, params = par.vsn)
> save(sig.byval.rma, file = "sig_byval_rma.rdat")
> save(sig.byval.vsn, file = "sig_byval_vsn.rdat")
```

When publishing the signature, the file "sig\_byval\_rma.rdat" or "sig\_byval\_vsn.rdat" can be made available on supplemental web-pages.

## 2.4 Diagnosing an external patient

We diagnose an external patient (`external_patient.CEL.gz`). Again, we proceed in three steps:

i) Read in the data

```
> abo.extrnl = ReadAffy("external_patient.CEL.gz")
```

ii) Add-on preprocess the data, transforming it to a study-consistent scale. The function `wrap.pag.add` utilizes the results from the theory section. In order to do that, data-dependent information stored with the signature has to be retrieved.

```
> load("sig_byval_rma.rdat")
> load("sig_byval_vsn.rdat")
> exs.extrnl.rma = wrap.pag.add(abo.extrnl, sig.byval.rma$params,
+   method = "rma")
> exs.extrnl.vsn = wrap.pag.add(abo.extrnl, sig.byval.vsn$params,
+   method = "vsn")
```

*iii*) Predict the class labels of the external patient, using the classifier derived beforehand:

```
> diag.rma = sig.byval.rma$sig(exprs(exs.extrnl.rma))
> diag.vsn = sig.byval.vsn$sig(exprs(exs.extrnl.vsn))
```

### 3 Supplement Figures

In the following we show figures displaying consistency and kappa indices for each data set. We show all possible combinations of classifiers (pam,svm), size (20,30,40), preprocessing protocol (rma,vsn) and strategy (by reference, by value). The dashed lines always depict the mean values.

Figure S1: Beer

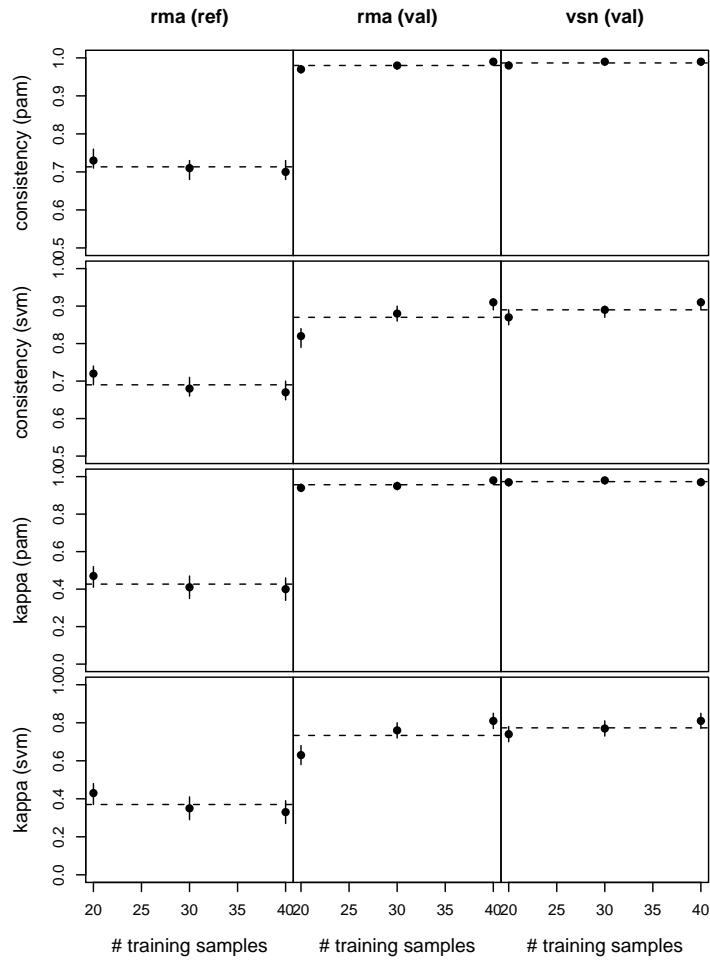

Figure S2: Bhattaharjee

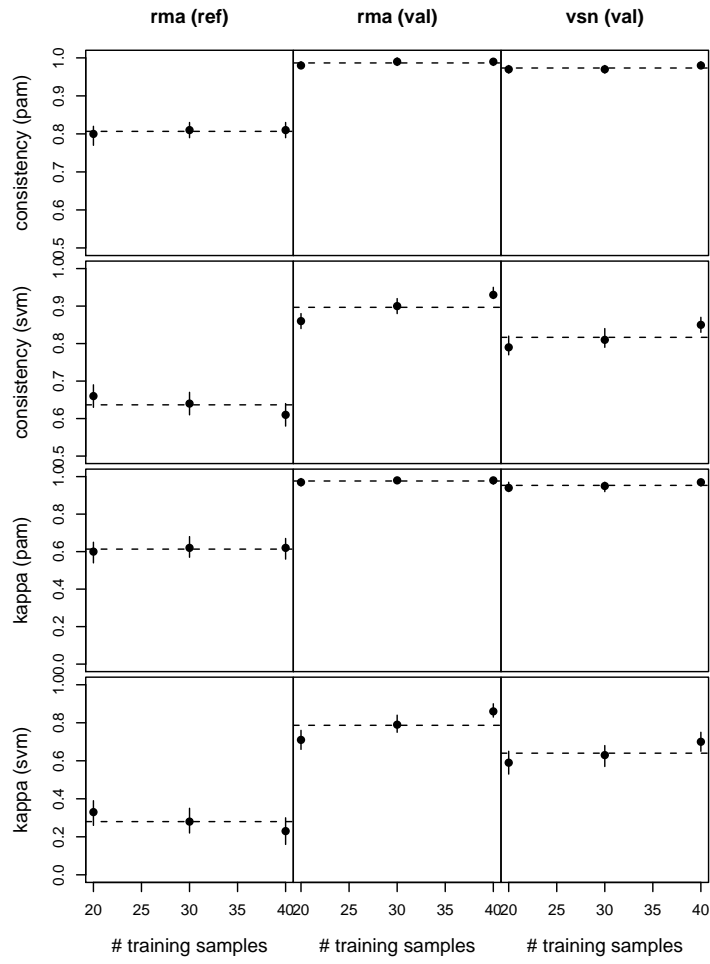

Figure S3: Bild

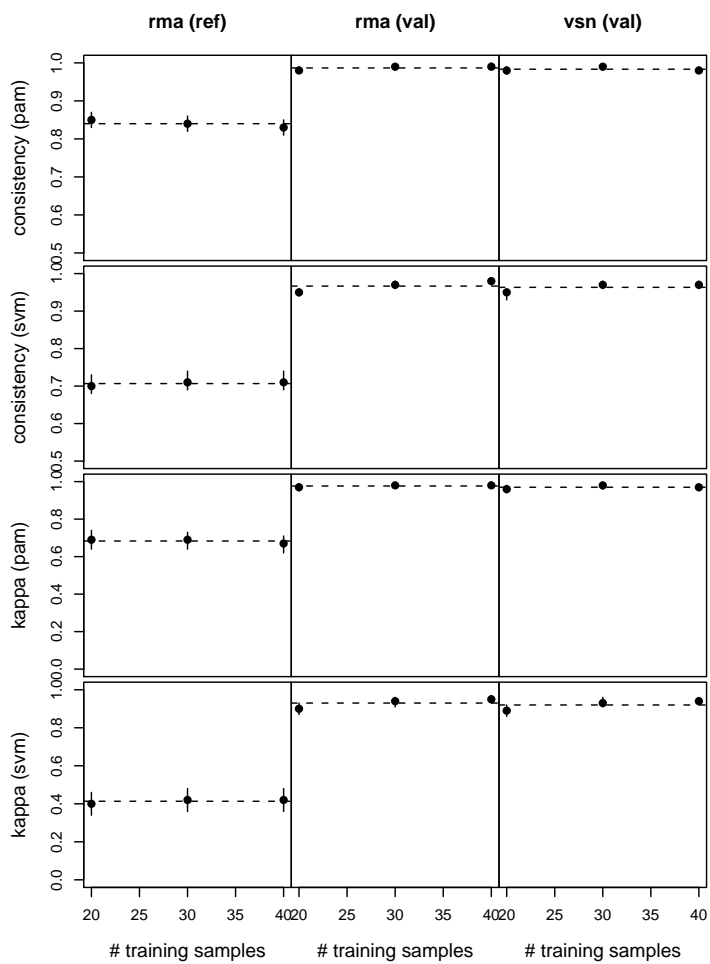

Figure S4: Huang

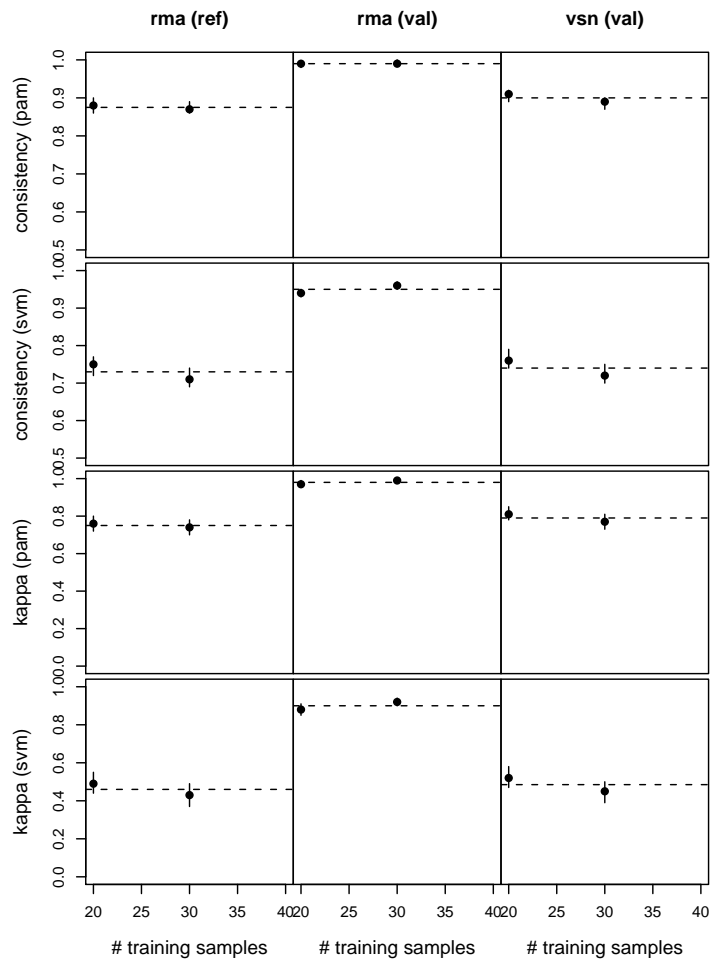



Figure S5: Pomeroy

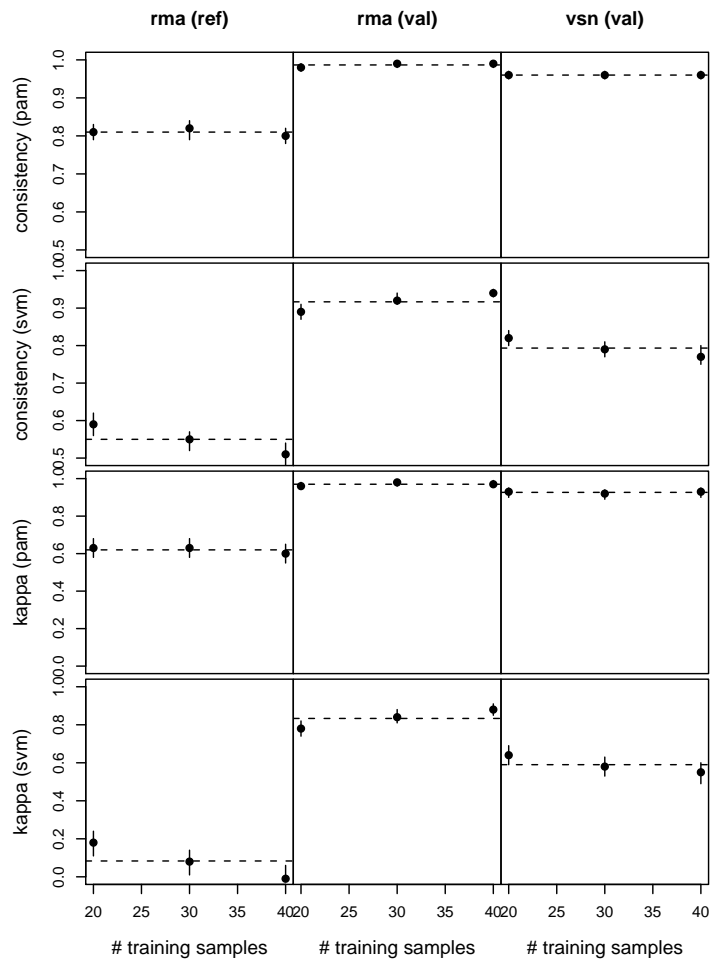

Figure S6: Ross

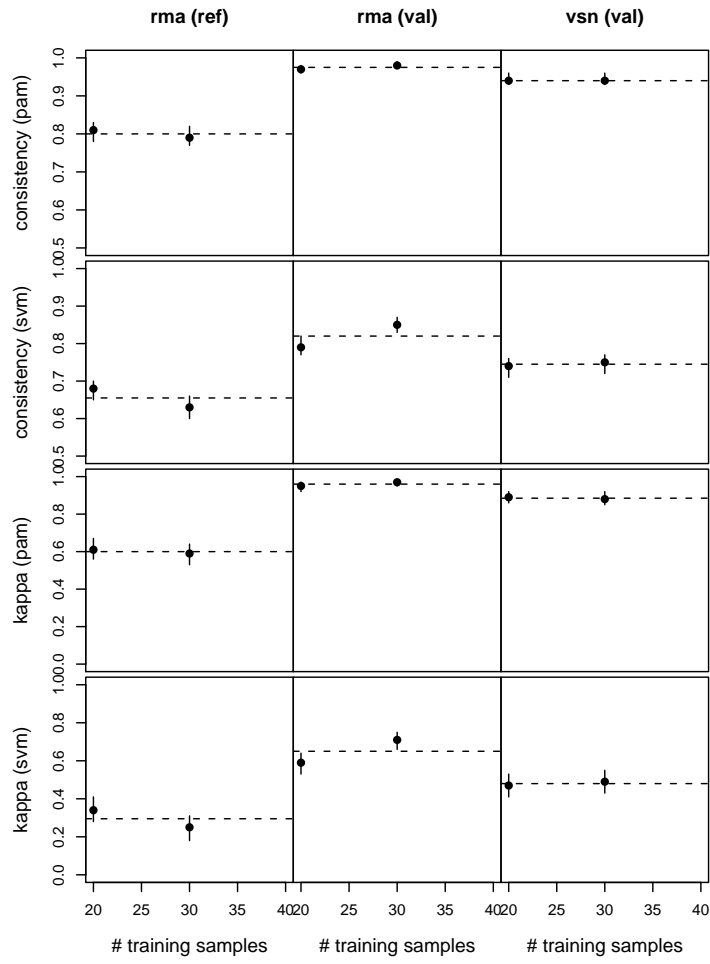

Figure S7: Shipp

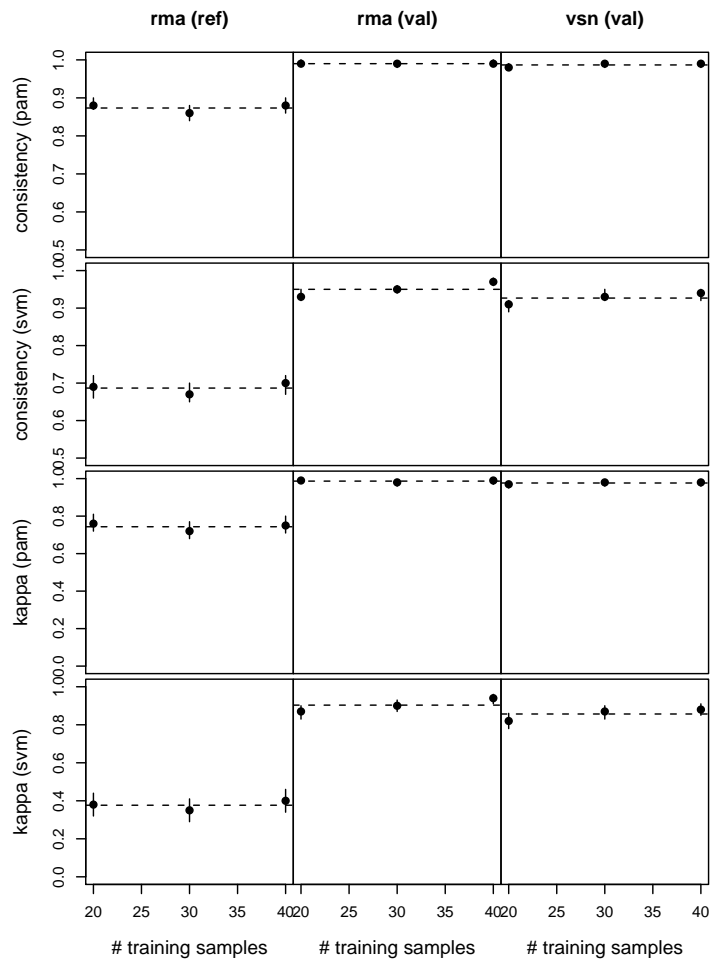

Figure S8: Willenbrock

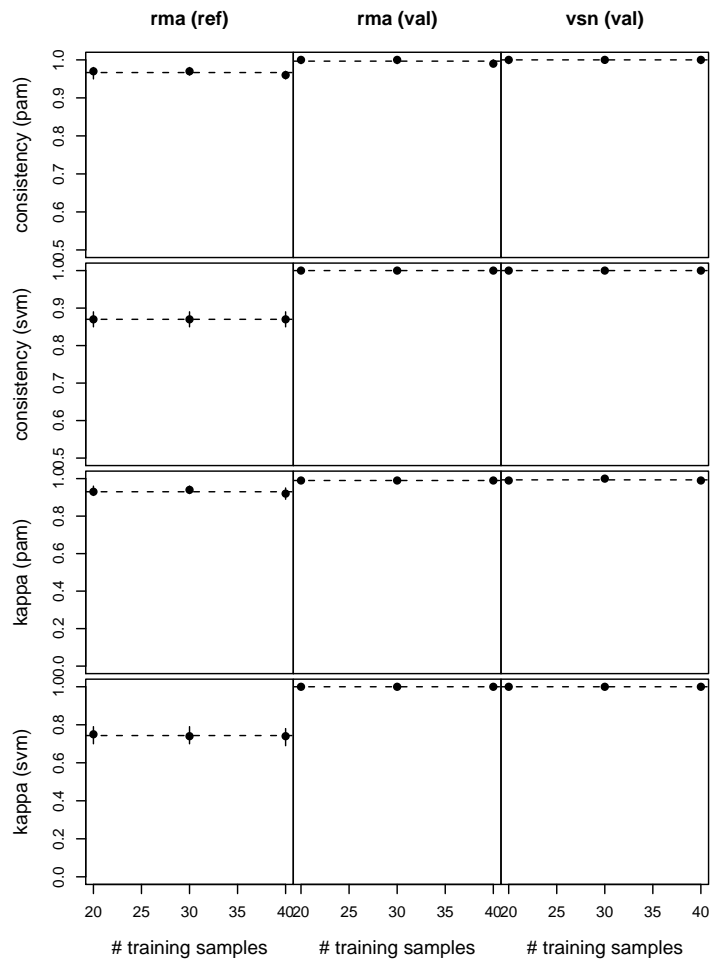

Supplement: pcbi.0040022.sd001.pdf [file pcbi.0040022.sd001.pdf]
