# Supplementary material
Source: PubMed Central journal article supplement (PMC2323353)

**rma (ref)****rma (val)****vsn (val)**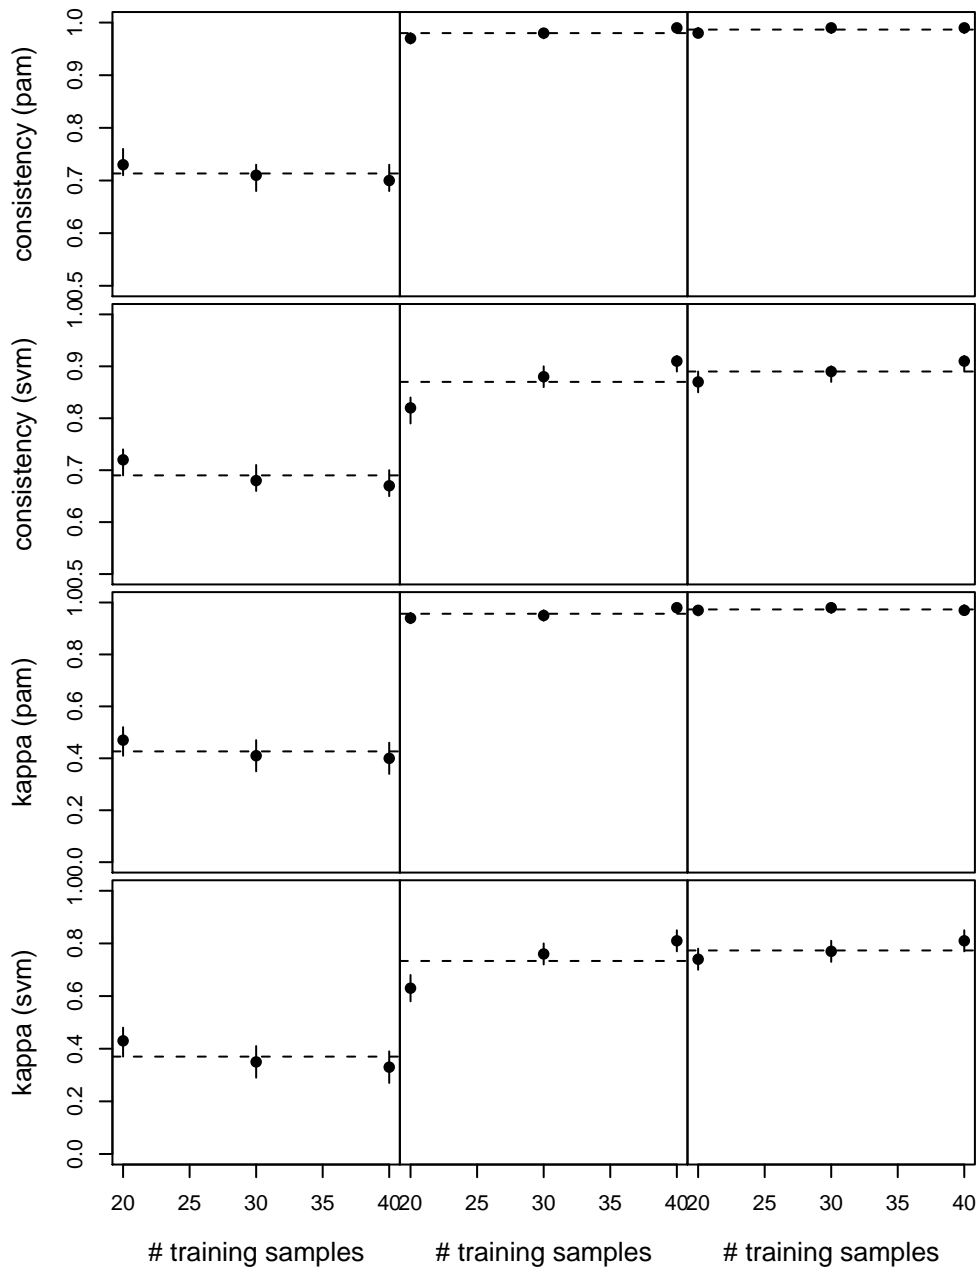

Supplement: pcbi.0040022.sg001.pdf [file pcbi.0040022.sg001.pdf]

**rma (ref)****rma (val)****vsn (val)**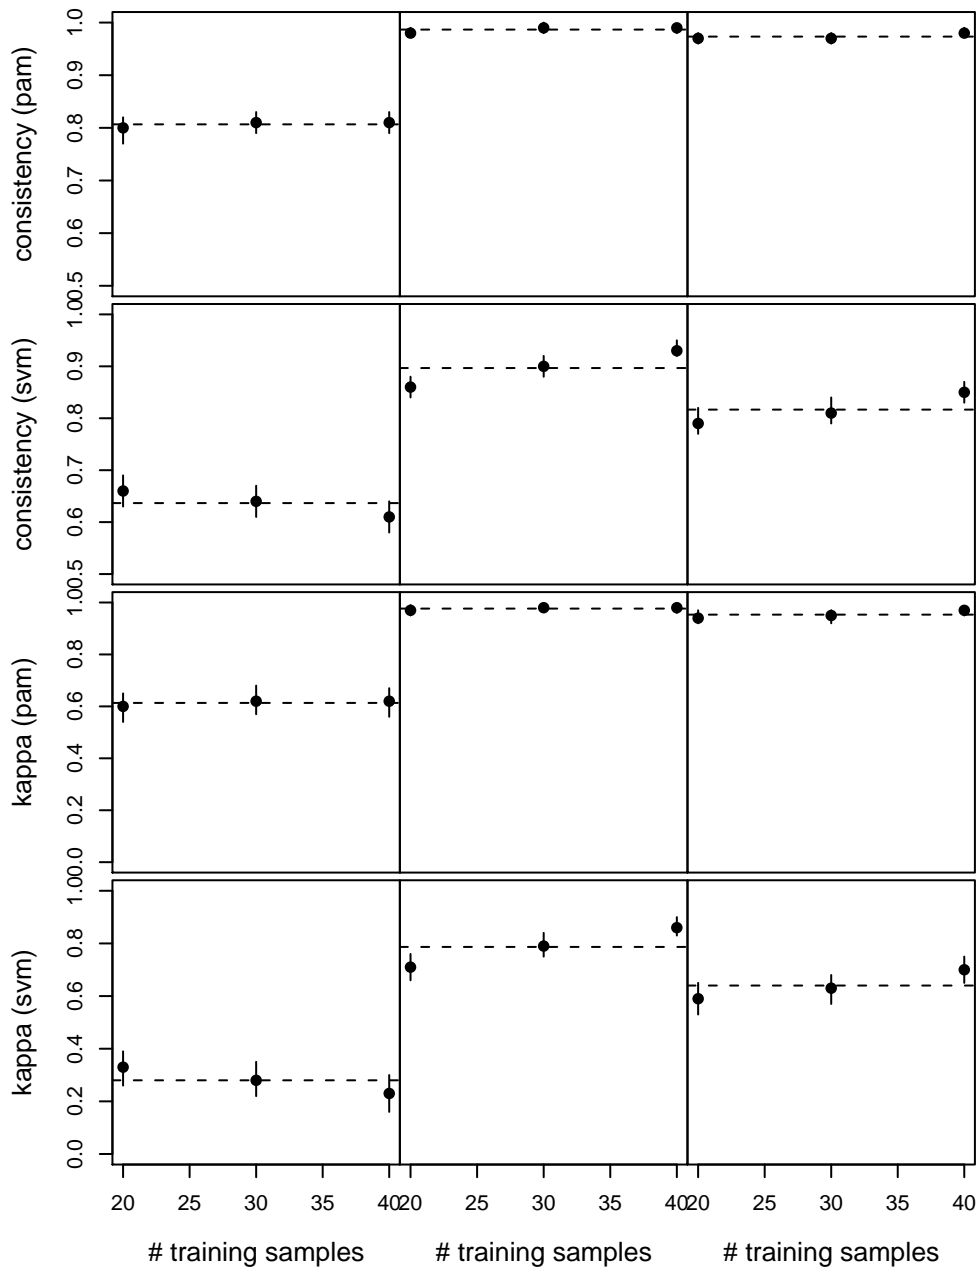

Supplement: pcbi.0040022.sg002.pdf [file pcbi.0040022.sg002.pdf]

rma (ref)

rma (val)

vsn (val)

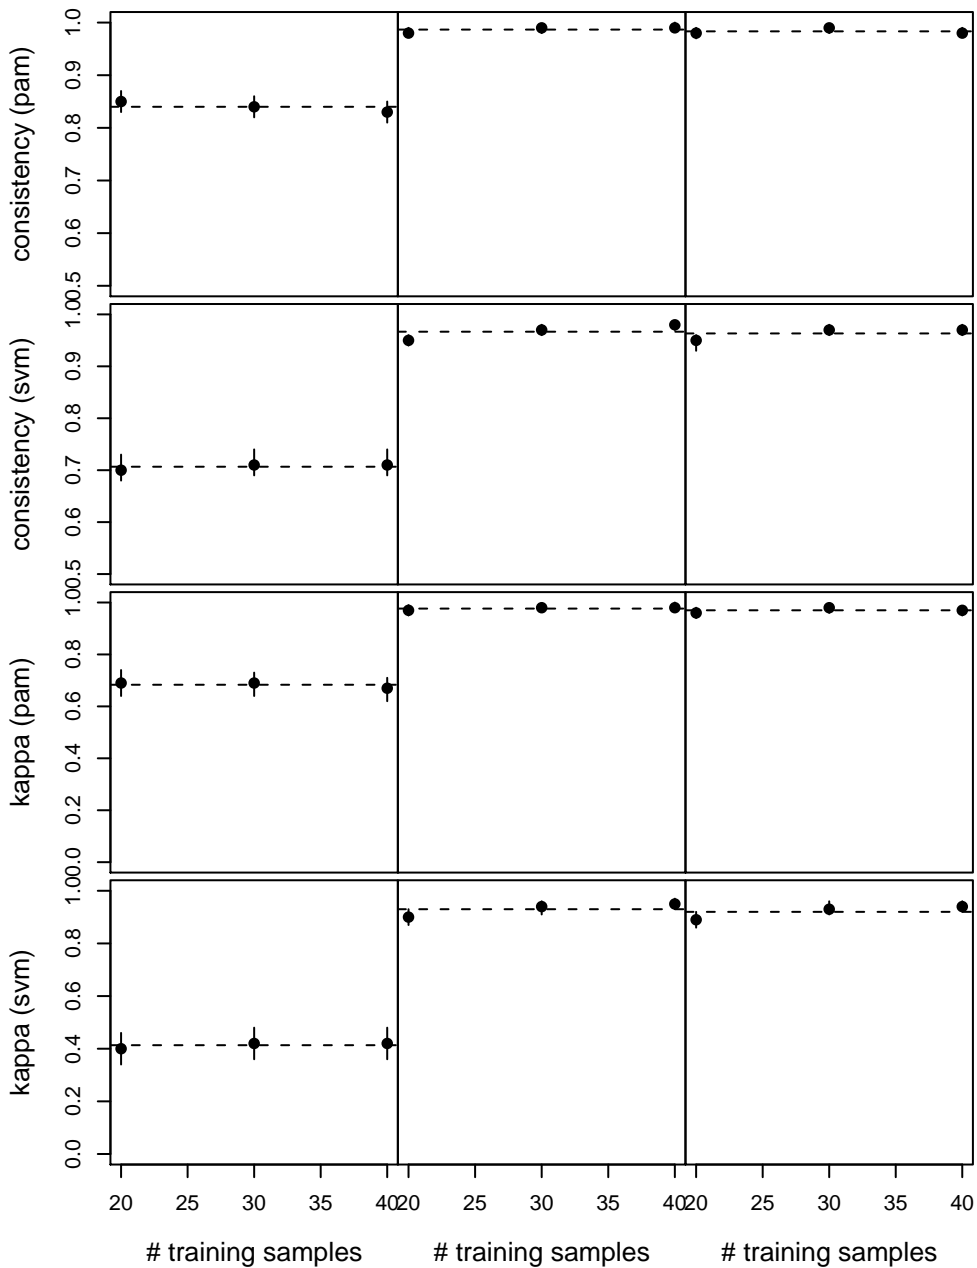

Supplement: pcbi.0040022.sg003.pdf [file pcbi.0040022.sg003.pdf]

rma (ref)

rma (val)

vsn (val)

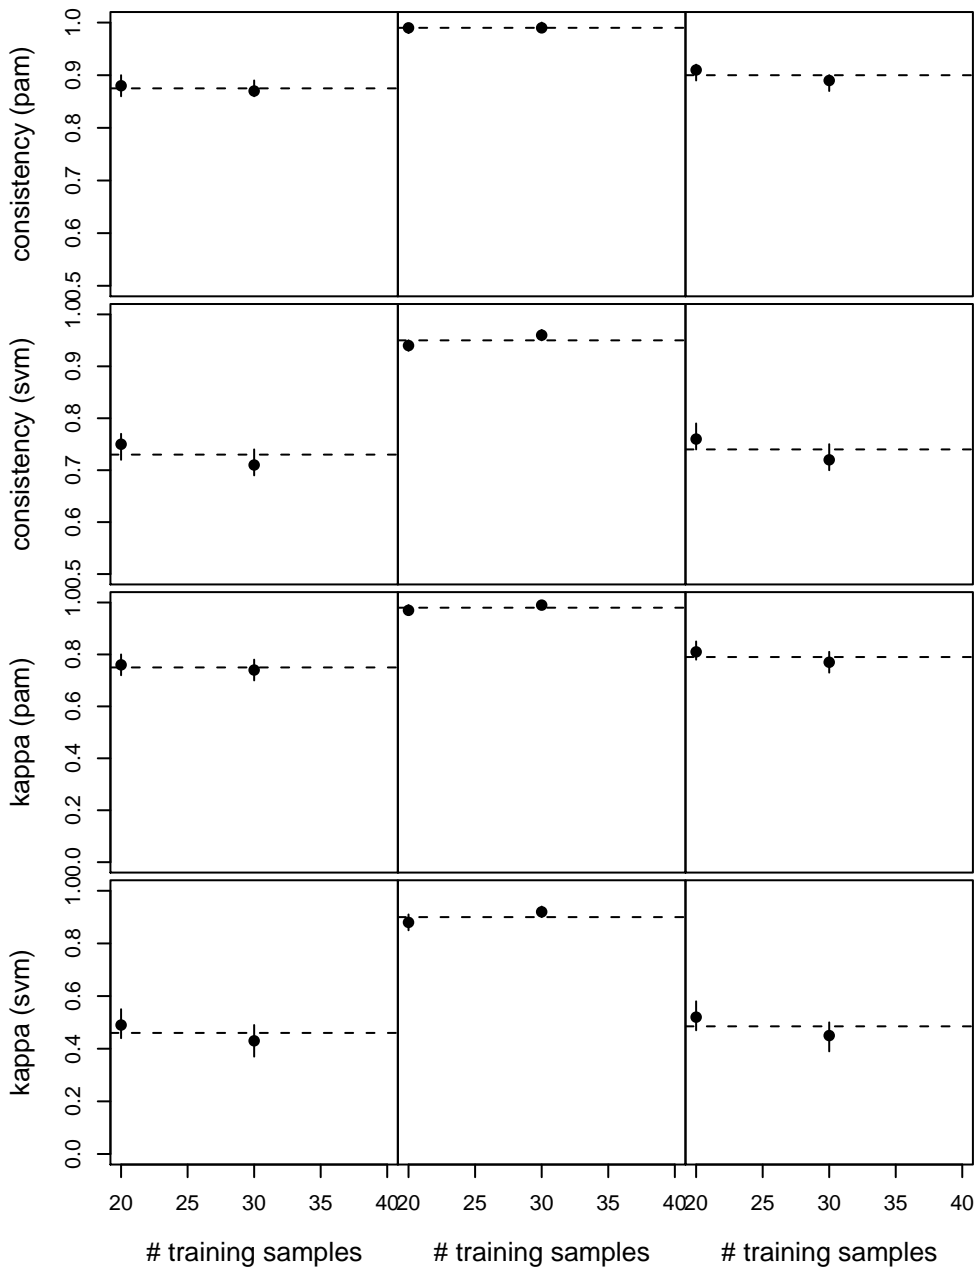

Supplement: pcbi.0040022.sg004.pdf [file pcbi.0040022.sg004.pdf]

**rma (ref)****rma (val)****vsn (val)**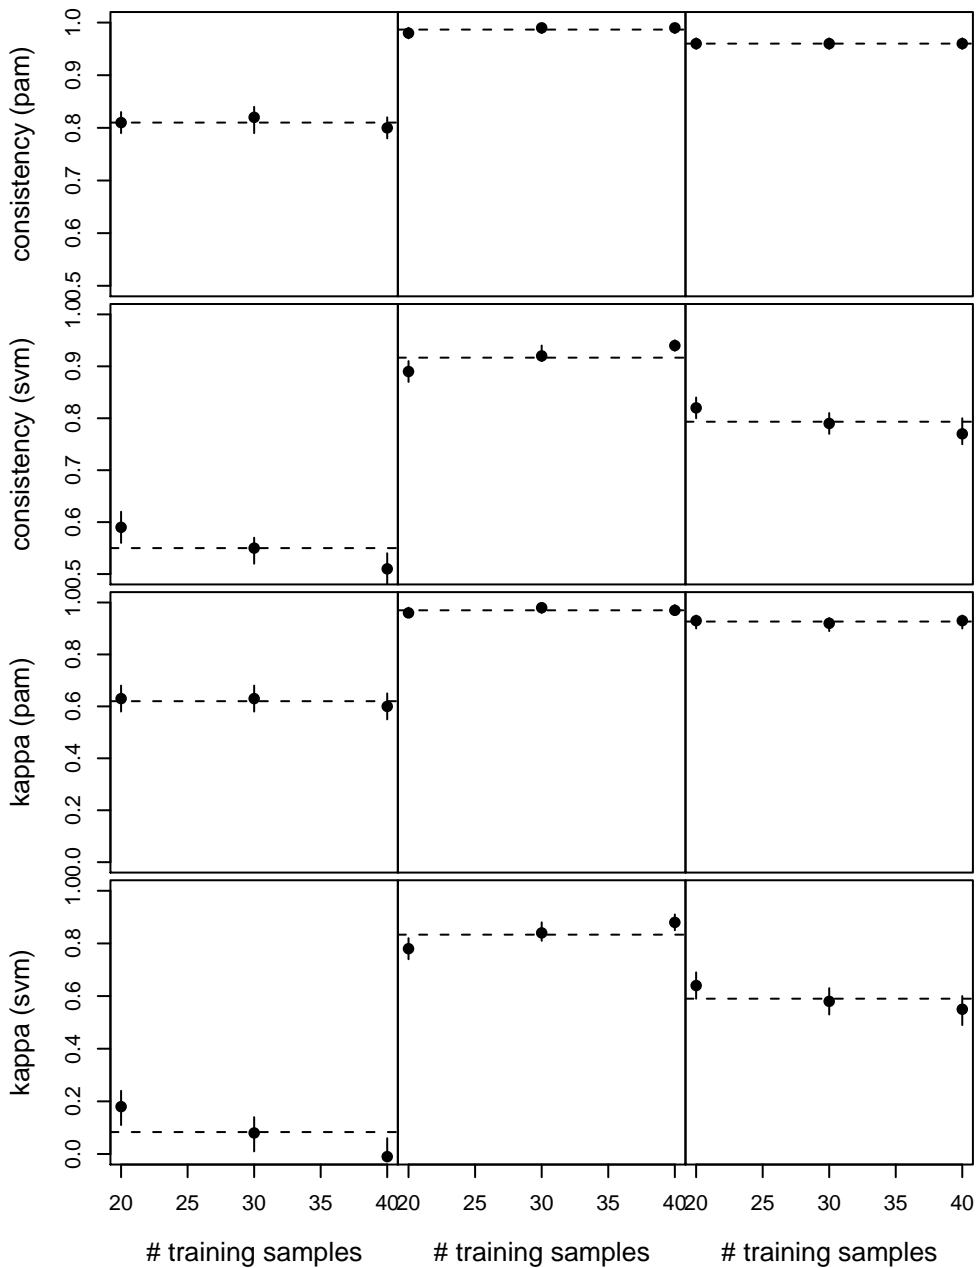

Supplement: pcbi.0040022.sg005.pdf [file pcbi.0040022.sg005.pdf]

**rma (ref)****rma (val)****vsn (val)**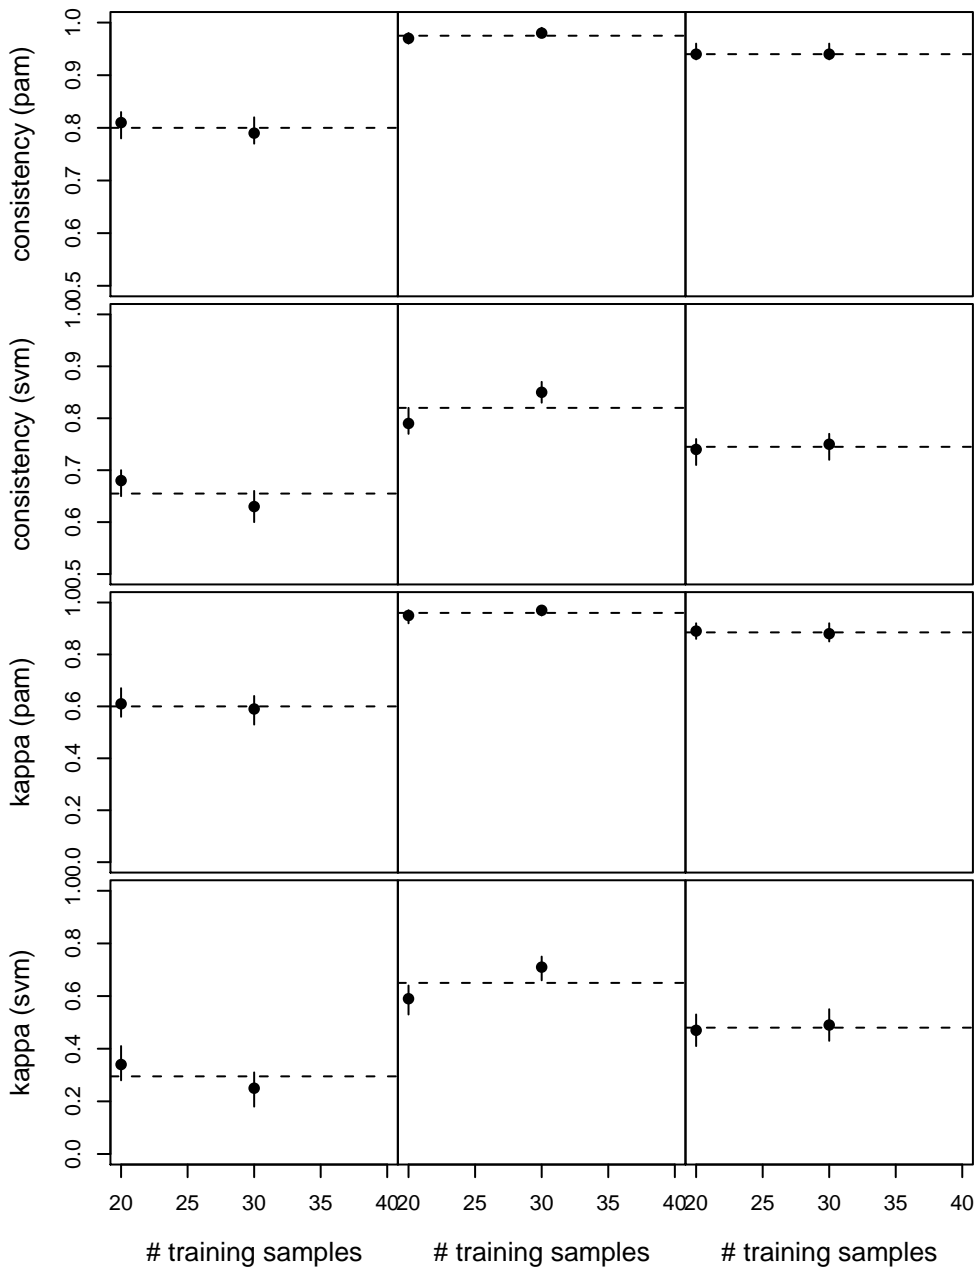

Supplement: pcbi.0040022.sg006.pdf [file pcbi.0040022.sg006.pdf]

rma (ref)

rma (val)

vsn (val)

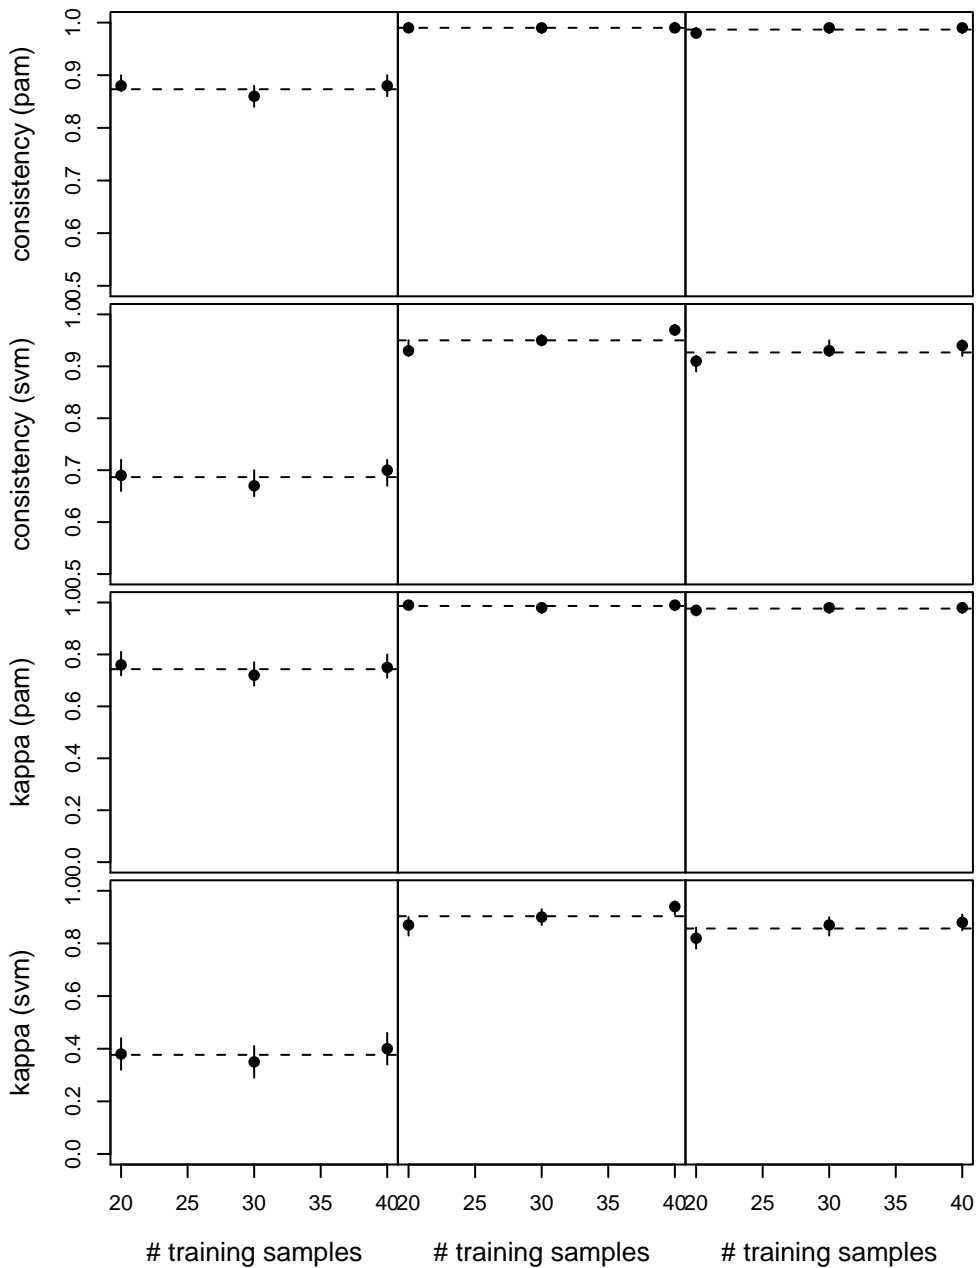

Supplement: pcbi.0040022.sg007.pdf [file pcbi.0040022.sg007.pdf]

rma (ref)

rma (val)

vsn (val)

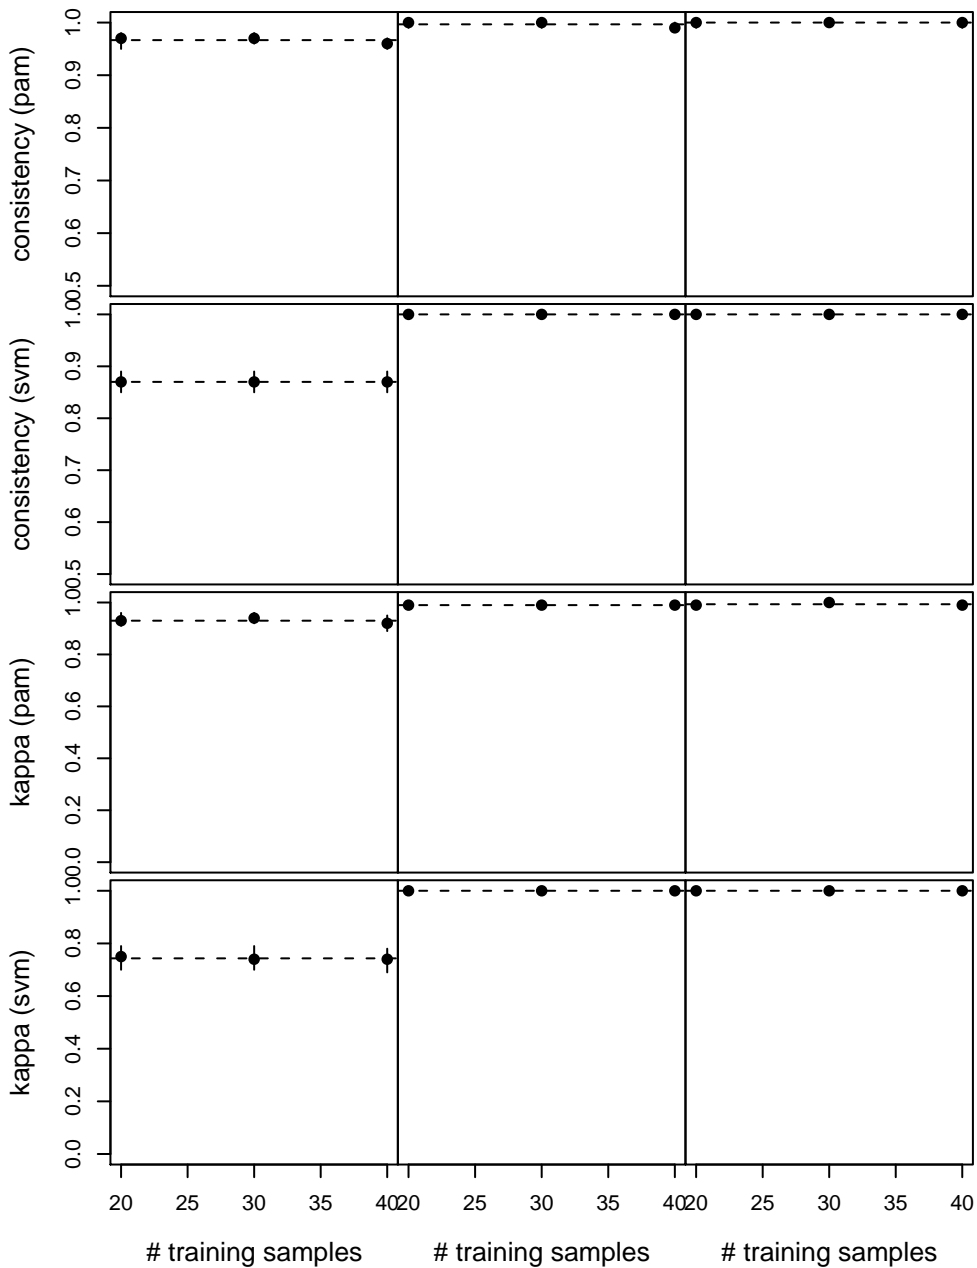

Supplement: pcbi.0040022.sg008.pdf [file pcbi.0040022.sg008.pdf]
